# Supplementary material for: WRKY22 Transcription Factor from Iris laevigata Regulates Flowering Time and Resistance to Salt and Drought
Source: MDPI journal article supplement (doi:10.3390/plants13091191), 2024-04-25
Supplement: s1 [file s1]

# Supplemental Figures

## Supplemental Figure S1.

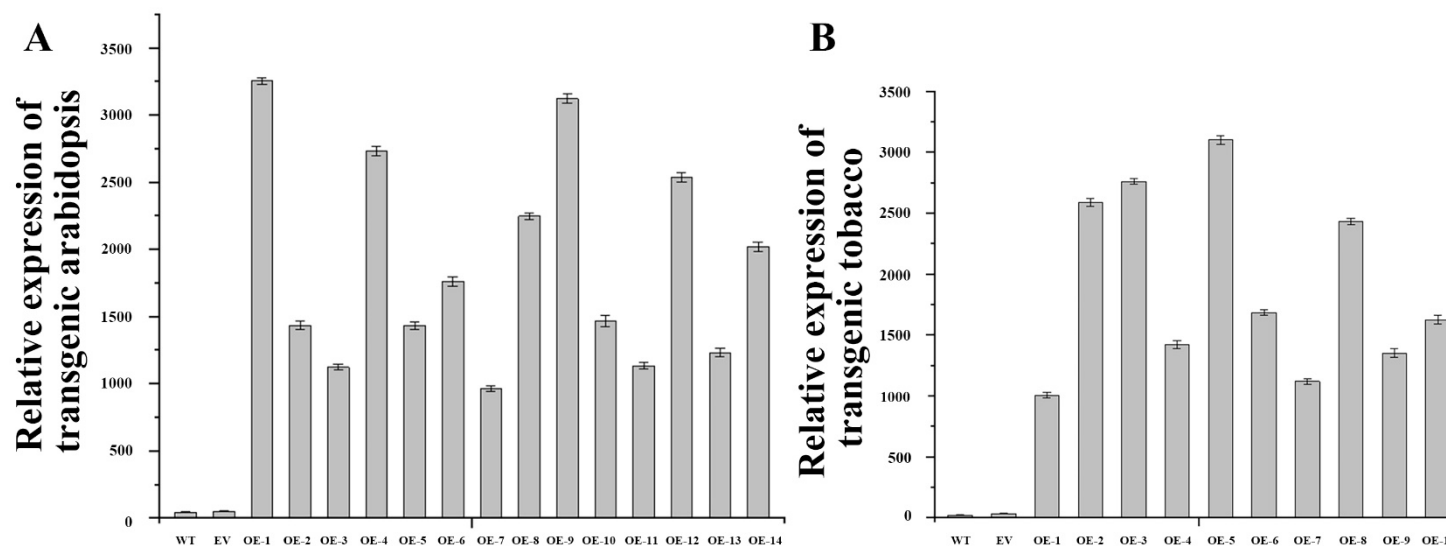

**Supplemental Figure 1.** Gene expression profile of *IlWRKY22* transgenic T3 generation plants. **A** Relative expression of *IlWRKY22* in fourteen T3 transgenic *A. thaliana* lines. **B** Relative expression of *IlWRKY22* in ten T3 transgenic *N. tabacum* lines.

## Supplemental Figure S2.

A

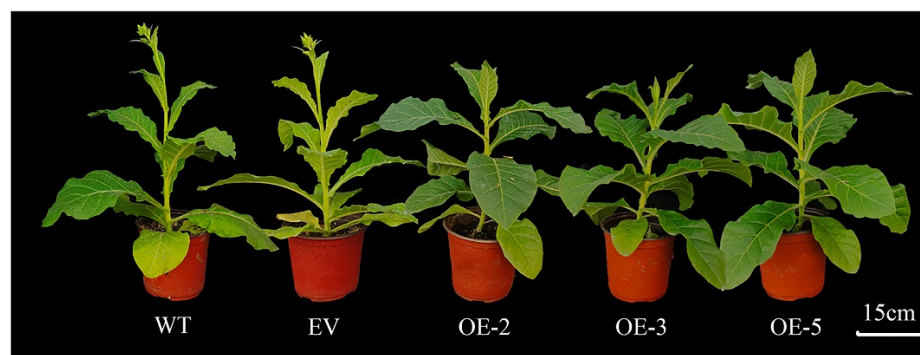

B

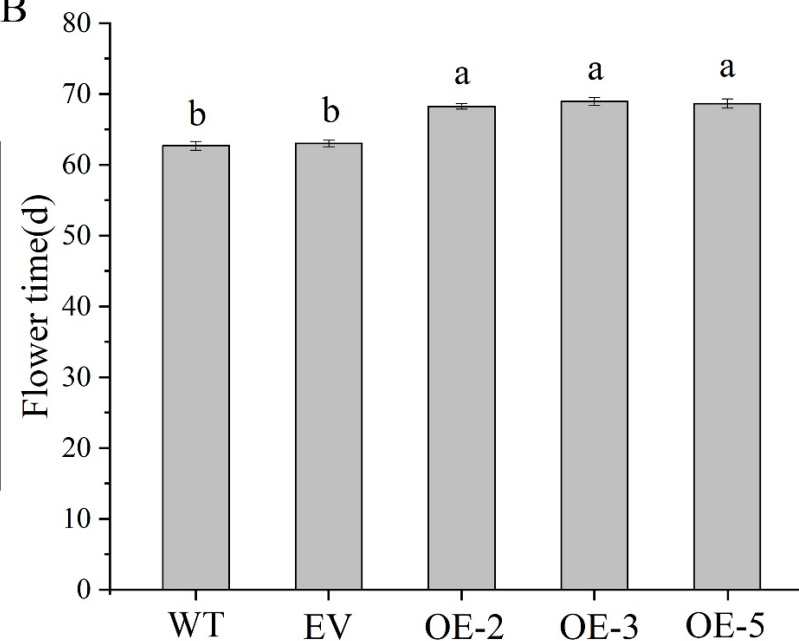

**Supplemental Figure 2.** Phenotypes of transgenic *N. tabacum* overexpressing *IlWRKY22*. **A** Phenotypic observation of transgenic *N. tabacum* overexpressing *IlWRKY22*. Scale bar was 15 cm. **B** Flowering time (opening of the first flower). Bar graph data are Mean  $\pm$  SD, marked with different lowercase letters to indicate significant differences ( $p < 0.05$ ). All these experiments were performed in triplicate.

## Supplemental Figure S3.

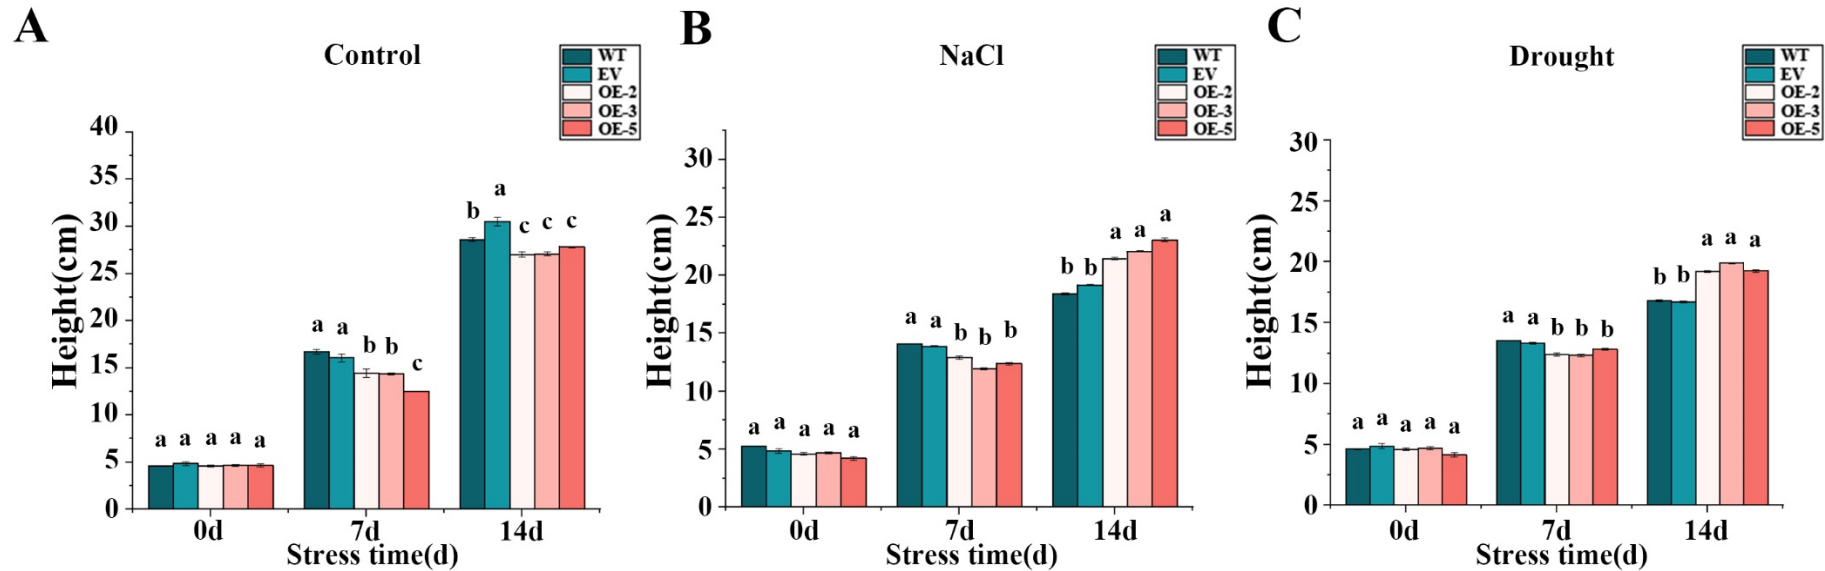

**Supplemental Figure 3.** Overall plant height under salt and drought stress at 0, 7 and 14 dpt. **A** Plant height observation of WT, EV, and OE lines of *N. tabacum* at 0, 7, and 14 days in the normal growth state. **B** Plant height observation of WT, EV, and OE lines of *N. tabacum* at 0, 7, and 14 days under NaCl stress at 300mM. **C** Plant height observation of WT, EV, and OE lines of *N. tabacum* at 0, 7, and 14 days under natural drought stress. Bar graph data are Mean  $\pm$  SD, marked with different lowercase letters to indicate

significant differences ( $p < 0.05$ ). All these experiments were performed in triplicate.
